1 **Technical Note: Quantifying music-dance synchrony with the application of a deep learning-**  
2 **based 2D pose estimator**

3

4 Filip Potemski BSc,<sup>1,2,3,4</sup> Andrea Sabo BAsC,<sup>1,5</sup> Kara K Patterson PT, PhD<sup>1,2,6</sup>

5 <sup>1</sup>KITE-Toronto Rehabilitation Institute, University Health Network, Toronto, Canada

6 <sup>2</sup>Department of Physical Therapy, University of Toronto, Toronto, Canada

7 <sup>3</sup>Department of Arts & Sciences, University of Toronto, Toronto, Canada

8 <sup>4</sup>Department of Applied Health Sciences, Brock University, St. Catherines, Canada

9 <sup>5</sup>Institute of Biomedical Engineering, University of Toronto, Toronto, Canada

10 <sup>6</sup>Rehabilitation Sciences Institute, University of Toronto, Toronto, Canada

11

12 **Conflict of Interest Disclosure:** None.

13 **Correspondence Address:**

14 Kara K Patterson, PT, PhD

15 Department of Physical Therapy

16 University of Toronto

17 160-500 University Avenue

18 Toronto, ON, Canada M5G 1V7

19 Email: [kara.patterson@utoronto.ca](mailto:kara.patterson@utoronto.ca)

20

21 **Running Title: Quantifying music-dance synchrony**

22

23 **Abstract**

24 Dance interventions are more effective at improving gait and balance outcomes than other  
25 rehabilitation interventions. Repeated training may culminate in superior motor performance  
26 compared to other interventions without synchronization. This technical note will describe a novel  
27 method using a deep learning-based 2D pose estimator: OpenPose, alongside beat analysis of  
28 music to quantify movement-music synchrony during salsa dancing. This method has four  
29 components: i) camera setup and recording, ii) tempo/downbeat analysis and waveform cleanup,  
30 iii) OpenPose estimation and data extraction, and iv) synchronization analysis. Two trials were  
31 recorded: one in which the dancer danced synchronously to the music and one where they did not.  
32 The salsa dancer performed a solo basic salsa step continuously for 90 seconds to a salsa track  
33 while their movements and the music were recorded with a webcam. This data was then extracted  
34 from OpenPose and analyzed. The mean synchronization value for both feet was significantly  
35 lower in the synchronous condition than the asynchronous condition, indicating that this is an  
36 effective means to track and quantify a dancer's movement and synchrony while performing a  
37 basic salsa step.

38 **Keywords:** synchronization, dancing, OpenPose, human pose tracking algorithm, motion analysis

39

## Introduction

40           Dance is a universal human activity that confers many benefits including aerobic fitness,  
41 better balance, emotional and social well-being, and stress reduction.<sup>1,2</sup> Anyone can benefit from  
42 dance including trained dancers, recreational dancers, older adults, and people with neurological  
43 conditions including Parkinson's disease and stroke.<sup>3-10</sup> As an adjunct to rehabilitation, dance  
44 interventions are more effective at improving gait and balance outcomes than other rehabilitation  
45 interventions.<sup>11</sup>

46           The advantages of dance over conventional exercise interventions may be derived from the  
47 synchronized movement to the rhythmic cues embedded in music. The extensive connectivity  
48 between the auditory and motor systems forms the basis for entrainment between rhythmic  
49 auditory signals and motor responses such as tapping your foot along to the beat in music.<sup>12-18</sup>  
50 These spontaneous synchronized movements may result from the processing of perceived rhythms  
51 by motor areas in the brain including the basal ganglia, supplementary motor area.<sup>16,19,20</sup> Thus,  
52 during dance, the rhythmic cues embedded in music, combined with the goal of synchronizing  
53 movement to those cues, may drive motor output. Repeated training may culminate in superior  
54 motor performance (such as better balance control) compared to other interventions without  
55 synchronization. This proposed mechanism is supported by the fact that music enhances motor  
56 performance and reduces metabolic costs of exercise in healthy adults<sup>12,21-23</sup> and rhythmic auditory  
57 cueing during rehabilitation sessions improves gait performance<sup>24</sup> and brain activation patterns<sup>25</sup>  
58 post-stroke.

59           To investigate this potential mechanism, it will be necessary to measure the movement of  
60 people while they are dancing and quantify how well they synchronize their movement to the  
61 music. The accuracy of this type of measurement depends heavily on the device used as well as

62 the location of that device on the body.<sup>20,26</sup> Quantitative movement analysis often requires costly  
63 devices such as 3D capture systems, accelerometers, gyroscopes, or force plates<sup>27,28</sup>. However,  
64 vision-based tracking systems are less expensive and less cumbersome alternatives.<sup>29</sup> With this in  
65 mind, our group used OpenPose,<sup>30,31</sup> a deep learning-based 2D keypoint estimator, to track dancer  
66 movements and subsequently compare the timing of their footfall events to the timing of the beat  
67 of the music to quantify movement synchronization. OpenPose<sup>30,31</sup> has been used for many  
68 different objectives including 3D pose estimation,<sup>32</sup> 3D model generation,<sup>33</sup> and analyzing features  
69 of gait.<sup>34</sup> This open-source software automatically obtains joint coordinates of the individuals in  
70 the image or video, enabling the calculation of parameters of interest. In this technical note, we  
71 will describe our novel method using OpenPose<sup>30,31</sup> alongside beat analysis of music to quantify  
72 movement-music synchrony during salsa dancing.

## 73 **Methods**

74 Our method quantifies how well a dancer's steps synchronize with the downbeat of the  
75 music to which they are dancing. We used 1 webcam (Logitech Meetup<sup>35</sup>, 1920x1080 pixels, 30  
76 fps) 1 desktop computer (Windows PC), and computer speakers in this process. A recreational  
77 salsa dancer (5 years experience) performed a solo basic salsa step continuously for 90 seconds to  
78 a salsa track while her movements and the salsa track (1411 Kbps) were recorded with the webcam.  
79 The method and analysis have four components: i) camera setup and video recording of salsa  
80 dancing, ii) tempo/downbeat analysis and waveform cleanup, iii) OpenPose estimation and data  
81 extraction, and iv) synchronization analysis. Figure 1 provides a visual summary of the data flow  
82 and interaction between these components.

84 *Figure 1:*

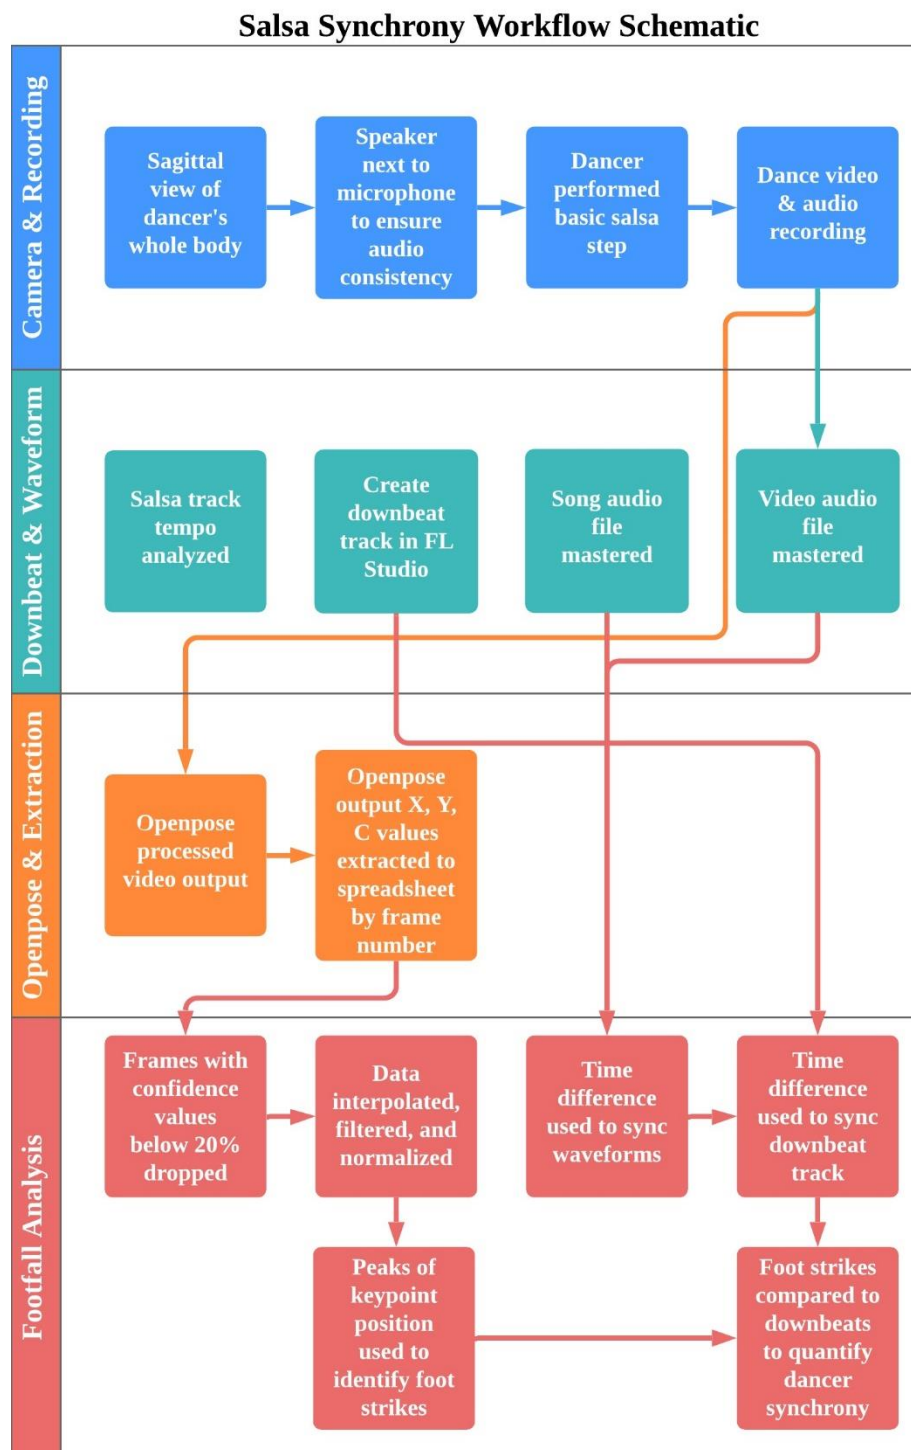

85

86 **Figure 1** – Workflow for salsa synchrony measure. Abbreviations: FL = Fruity loops; X = x coordinates, Y = y coordinates, C =  
87 confidence values.

88 Camera Setup and Video Recording of Salsa Dancing:

89 The webcam was positioned to capture the dancer's whole body in a sagittal view and to  
90 avoided filming at an angle to reduce image distortion (dance video). This is important to avoid  
91 parallax error in lateral views.<sup>36</sup> We also reduced visual background clutter and ensured the  
92 participant was well lit to avoid further information inaccuracies during OpenPose analysis. We  
93 placed the speaker playing the salsa track next to the microphone of the webcam to ensure  
94 consistency between audio waveforms of the salsa track and the dance video. We recorded audio  
95 on the same device as the video. Our participant performed a basic salsa step (Figure 2),  
96 continuously for 90 seconds under two conditions. In the synchronous condition, she danced on in  
97 time with the music. In the asynchronous condition, she intentionally danced out of time with the  
98 music.

99 *Figure 2:*

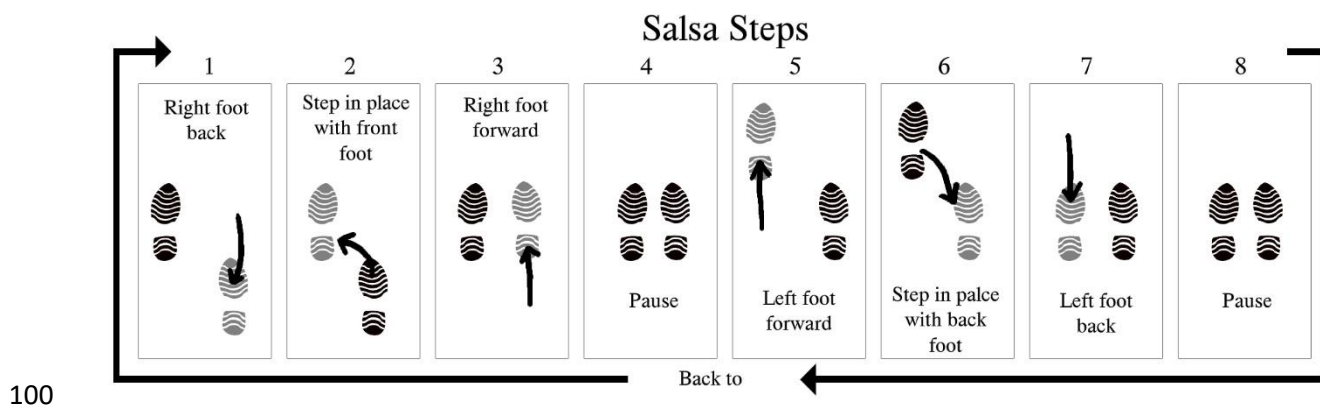

101 **Figure 2** – Salsa Step Pattern. The positioning (represented by shoe prints) and direction (represented by arrows) of steps for the  
102 basic salsa step. The music counts on which each step occurs are listed above.

103 Tempo/Downbeat Analysis and Waveform Cleanup:

104 Separate from the video recording of the salsa dancing, we analyzed the tempo of the salsa  
105 track with the free version of Fruity Loops (FL) Studio (Edition 20.6, Image Line Software, Ghent,  
106 Belgium) digital audio workstation (DAW) and its built-in tempo analysis. From this analysis, we

107 created a new audio track of audible beats matched to the salsa song (downbeat track). We used a  
108 tone for the audible beats with limited distortion to ensure a clean audio waveform for later  
109 analysis. We visually and aurally evaluated the downbeat track to ensure it aligned with the salsa  
110 track and exported the track as a .WAV file.

111 To clean up the audio waveforms recorded in the dance video as well as the song track for  
112 later analysis, we used FL Studio. We used the equalizer tool to cut all frequencies below 40Hz in  
113 both recordings to reduce background noise. We then used the multiband compressor tool to  
114 highlight high and low frequencies in the recordings to make the peaks and troughs of the  
115 waveforms more differentiable. We used a second equalizer tool to further boost relevant  
116 frequencies, followed by a limiter to prevent clipping the audio on the high end and distorting the  
117 waveform. Finally, we exported the mastered audio files as .WAV files for analysis.

#### 118 OpenPose Estimation and Data Extraction:

119 A public release of OpenPose (Version 1.5.0) was run on a Windows machine and used to  
120 analyze the dance video. Each frame of the dance video was processed to output a .JSON file  
121 containing the X and Y coordinates and confidence values for each of the 25 estimated keypoints  
122 (Figure 2). These files were then zipped into a single folder. To avoid working with many small  
123 files, the data from the .JSON files were extracted to a .CSV file using a Python script and ordered  
124 as a function of frame number.

#### 125 Footfall & Salsa Synchrony Analysis:

126 The .CSV file created in Python was imported to MATLAB (Version 9.7, Mathworks,  
127 Natick, MA, USA) where the keypoints defined by OpenPose, and corresponding to the big toe of  
128 the left and right feet (keypoints 19 and 22 respectively<sup>37</sup>) were used to create a new table. All  
129 frames with confidence values under 20% were dropped and data was interpolated using

130 MATLAB's *interp1*<sup>38</sup> function, then NaN values were interpolated using the *inpaint\_NaN*  
131 function<sup>39</sup> with a plate equation and an interpolating operator of delta cubed. Data was then filtered  
132 with a lowpass filter (2<sup>nd</sup> order Butterworth with a cut-off frequency at 4 Hz) using the zero-phase  
133 filtering operation: *filtfilt*<sup>40</sup> and normalized to -1,1 coordinates. The time of each frame was  
134 derived from the frame number over the recording device's frames per second rate.

135 The audio waveforms from the dance video, salsa track, and downbeat track were also  
136 imported into MATLAB and lowpass filtered (2<sup>nd</sup> order Butterworth with a cut-off frequency of  
137 0.707 Hz). Then, using MATLAB's *alignsignals*<sup>41</sup> function, the salsa track waveform was synced  
138 up to the video waveform. Based on the time difference between the two waveforms, the downbeat  
139 track waveform was aligned to match up to the video waveform. Utilizing MATLAB's *findpeaks*<sup>42</sup>  
140 function, each peak of the downbeat track waveform was marked to represent the music's  
141 downbeats.

142 Since the participant was recorded in a sagittal view most of the movement or interest was  
143 captured by the x-values. The peaks or troughs of the keypoint of interest's X-value position were  
144 used to indicate foot strikes. Using MATLAB's *findpeaks*<sup>42</sup> function again, these peaks were  
145 found. We then overlaid the downbeat points onto the foot position data for a visual representation  
146 of movement synchrony as seen in Figure 3. Time, foot strike, and beats were combined into a  
147 single table and exported as an .XLS file for further analysis. Synchronization of the participant's  
148 steps to the music was quantified by calculating the difference in time (seconds) between the  
149 occurrence of beats 1 and 5 of the music to the occurrence of the nearest right backward and left  
150 forward footfall events respectively (as described in Figure 2). These values were averaged for  
151 each foot over each of the two conditions (synchronous and asynchronous).



152 *Figure 3*

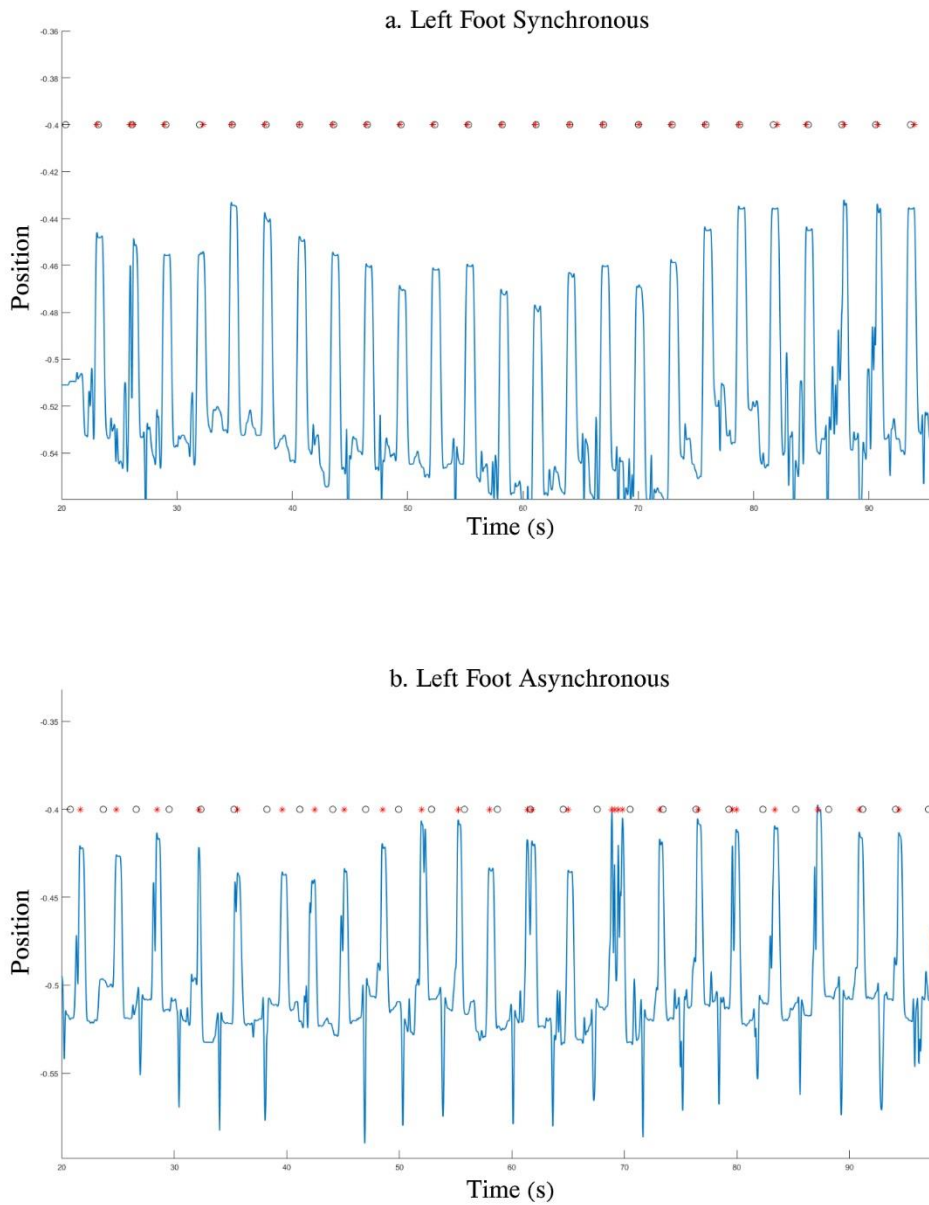

153

154 **Figure 3a/b** – Plot of Estimated Synchronized & Asynchronized Left Foot Strikes against Downbeat 5. Black circles indicate  
155 downbeats, red stars indicate foot strikes, and blue lines indicate keypoint position.



178 is useful for future work that will explore the relationship between the physical and psychosocial  
179 benefits of dance and the capacity for movement synchronization to music.

180 Potential problems that occur with our methods include background noise and low  
181 OpenPose keypoint confidence values. Due to this fact, our method uses audio waveforms to sync  
182 up the audio and video information, however, background noise can interfere with waveform  
183 analysis. We attempted to address this by positioning the speaker playing the salsa track as close  
184 as possible to the webcam recording the dance video. Another concern is that confidence values for  
185 some keypoints can be very low depending on angles and the type of movement recorded. For  
186 example, these low confidence values can indicate a dropped frame or OpenPose confusing body  
187 parts. We attempted to address this by removing visual clutter in the frame, properly lighting the  
188 participant during trials, removing points with low confidence, and interpolating between the  
189 points with higher confidence.

190 OpenPose has already been used in gait analysis research.<sup>34,44,45</sup> We believe that our work  
191 here adds to the research on using accessible and affordable deep-learning-based keypoint  
192 estimators in the analysis of complex movements such as dance.

### 193 **Acknowledgements**

194 This work was supported by a Collaboratives Health Research Project (CHRP) grant jointly funded  
195 by the National Science and Engineering Research Council and the Canadian Institutes of Health  
196 Research.

197

## References

- 198 1. Garber CE, McKinney JS, Carleton RA. Is aerobic dance an effective alternative to walk-  
199 jog exercise training? *J Sports Med Phys Fitness*. 1992;32(2):136-141. Accessed May 28,  
200 2019. <http://www.ncbi.nlm.nih.gov/pubmed/1434581>
- 201 2. Quiroga Murcia C, Kreutz G, Clift S, Bongard S. Shall we dance? An exploration of the  
202 perceived benefits of dancing on well-being. *Arts Health*. 2010;2(2):149-163.  
203 doi:10.1080/17533010903488582
- 204 3. Crotts D, Thompson B, Nahom M, Ryan S, Newton RA. Balance Abilities of Professional  
205 Dancers on Select Balance Tests. *J Orthop Sport Phys Ther*. 1996;23(1):12-17.  
206 doi:10.2519/jospt.1996.23.1.12
- 207 4. Gerbino PG, Griffin ED, Zurawski D. Comparison of standing balance between female  
208 collegiate dancers and soccer players. *Gait Posture*. 2007;26(4):501-507.  
209 doi:10.1016/j.gaitpost.2006.11.205
- 210 5. Verghese J. Cognitive and mobility profile of older social dancers. *J Am Geriatr Soc*.  
211 2006;54(8):1241-1244. doi:10.1111/j.1532-5415.2006.00808.x
- 212 6. Zhang J-G, Ishikawa-Takata K, Yamazaki H, Morita T, Ohta T. Postural stability and  
213 physical performance in social dancers. *Gait Posture*. 2008;27(4):697-701.  
214 doi:10.1016/j.gaitpost.2007.09.004
- 215 7. Beaudry L, Fortin S, Rochette A. Adapted dance used in subacute rehabilitation post-stroke:  
216 impacts perceived by patients, relatives and rehabilitation therapists. *Disabil Rehabil*.  
217 Published online 2019:1-10. doi:10.1080/09638288.2019.1581845
- 218 8. López-Ortiz C, Egan T, Gaebler-Spira DJ. Pilot study of a targeted dance class for physical  
219 rehabilitation in children with cerebral palsy. *SAGE open Med*. 2016;4:2050312116670926-  
220 2050312116670926. doi:10.1177/2050312116670926
- 221 9. McKay JL, Ting LH, Hackney ME. Balance, Body Motion, and Muscle Activity After  
222 High-Volume Short-Term Dance-Based Rehabilitation in Persons With Parkinson Disease:  
223 A Pilot Study. *J Neurol Phys Ther*. 2016;40(4):257-268.  
224 doi:10.1097/NPT.0000000000000150
- 225 10. Salgado R, de Paula Vasconcelos LA. The Use of Dance in the Rehabilitation of a Patient  
226 with Multiple Sclerosis. *Am J Danc Ther*. 2010;32(1):53-63. doi:10.1007/s10465-010-  
227 9087-x
- 228 11. Shanahan J, Morris ME, Bhriain ON, Saunders J, Clifford AM. Dance for People With  
229 Parkinson Disease: What Is the Evidence Telling Us? *Arch Phys Med Rehabil*.  
230 2015;96(1):141-153. doi:10.1016/j.apmr.2014.08.017
- 231 12. Simpson SD, Karageorghis CI. The effects of synchronous music on 400-m sprint  
232 performance. *J Sports Sci*. 2006;24(10):1095-1102. doi:10.1080/02640410500432789
- 233 13. Chen JL, Penhune VB, Zatorre RJ. Moving on Time: Brain Network for Auditory-Motor  
234 Synchronization is Modulated by Rhythm Complexity and Musical Training. *J Cogn  
235 Neurosci*. 2008;20(2):226-239. doi:10.1162/jocn.2008.20018

- 236 14. Chen JL, Zatorre RJ, Penhune VB. Interactions between auditory and dorsal premotor  
237 cortex during synchronization to musical rhythms. *Neuroimage*. 2006;32(4):1771-1781.  
238 doi:10.1016/j.neuroimage.2006.04.207
- 239 15. Grahn JA, Brett M. Rhythm and Beat Perception in Motor Areas of the Brain. *J Cogn*  
240 *Neurosci*. 2007;19(5):893-906. doi:10.1162/jocn.2007.19.5.893
- 241 16. Grahn JA, Rowe JB. Feeling the beat: premotor and striatal interactions in musicians and  
242 nonmusicians during beat perception. *J Neurosci*. 2009;29(23):7540-7548.  
243 doi:10.1523/JNEUROSCI.2018-08.2009
- 244 17. Thaut MH, Abiru M. Rhythmic Auditory Stimulation in Rehabilitation of Movement  
245 Disorders: A Review Of Current Research. *Music Percept*. 2010;27(4):263-269.  
246 doi:10.1525/mp.2010.27.4.263
- 247 18. Zatorre RJ, Chen JL, Penhune VB. When the brain plays music: auditory–motor interactions  
248 in music perception and production. *Nat Rev Neurosci*. 2007;8(7):547-558.  
249 doi:10.1038/nrn2152
- 250 19. O’Halloran J, Hamill J, McDermott WJ, Remelius JG, Van Emmerik REA. Locomotor-  
251 respiratory coupling patterns and oxygen consumption during walking above and below  
252 preferred stride frequency. *Eur J Appl Physiol*. 2011;112(3):929-940. doi:10.1007/s00421-  
253 011-2040-y
- 254 20. Atallah L, Lo B, King R, Yang G-Z. Sensor Positioning for Activity Recognition Using  
255 Wearable Accelerometers. *IEEE Trans Biomed Circuits Syst*. 2011;5(4):320-329.  
256 doi:10.1109/tbcas.2011.2160540
- 257 21. Karageorghis CI, Drew KM, Terry PC. Effects of Pretest Stimulative and Sedative Music  
258 on Grip Strength. *Percept Mot Skills*. 1996;83(3\_suppl):1347-1352.  
259 doi:10.2466/pms.1996.83.3f.1347
- 260 22. Rendi M, Szabo A, Szabó T. Performance Enhancement with Music in Rowing Sprint. *Sport*  
261 *Psychol*. 2008;22(2):175-182. doi:10.1123/tsp.22.2.175
- 262 23. Bacon CJ, Myers TR, Karageorghis CI. Effect of music-movement synchrony on exercise  
263 oxygen consumption. *J Sports Med Phys Fitness*. 2012;52(4):359-365.
- 264 24. Thaut MH, Leins AK, Rice RR, et al. Rhythmic Auditor y Stimulation Improves Gait More  
265 Than NDT/Bobath Training in Near-Ambulatory Patients Early Poststroke: A Single-Blind,  
266 Randomized Trial. *Neurorehabil Neural Repair*. 2007;21(5):455-459.  
267 doi:10.1177/1545968307300523
- 268 25. Luft AR, McCombe-Waller S, Whitall J, et al. Repetitive bilateral arm training and motor  
269 cortex activation in chronic stroke: a randomized controlled trial. *JAMA*.  
270 2004;292(15):1853-1861. doi:10.1001/jama.292.15.1853
- 271 26. Cleland I, Kikhia B, Nugent C, et al. Optimal placement of accelerometers for the detection  
272 of everyday activities. *Sensors (Basel)*. 2013;13(7):9183-9200. doi:10.3390/s130709183
- 273 27. Muro-de-la-Herran A, García-Zapirain B, Méndez-Zorrilla A. Gait analysis methods: An  
274 overview of wearable and non-wearable systems, highlighting clinical applications. *Sensors*

- 275 (Switzerland). 2014;14(2):3362-3394. doi:10.3390/s140203362
- 276 28. Yang CC, Hsu YL. A review of accelerometry-based wearable motion detectors for physical  
277 activity monitoring. *Sensors*. 2010;10(8):7772-7788. doi:10.3390/s100807772
- 278 29. Simon SR. Quantification of human motion: Gait analysis - Benefits and limitations to its  
279 application to clinical problems. *J Biomech*. 2004;37(12):1869-1880.  
280 doi:10.1016/j.jbiomech.2004.02.047
- 281 30. Cao Z, Hidalgo Martinez G, Simon T, Wei S-E, Sheikh YA. OpenPose: Realtime Multi-  
282 Person 2D Pose Estimation using Part Affinity Fields. *IEEE Trans Pattern Anal Mach Intell*.  
283 Published online July 17, 2019:1-1. doi:10.1109/tpami.2019.2929257
- 284 31. Hidalgo Martinez G, Simon T, Wei S-E, Sheikh YA, Cao Z, Joo H. OpenPose library.  
285 <https://github.com/CMU-Perceptual-Computing-Lab/openpose>
- 286 32. Panteleris P, Oikonomidis I, Argyros A. Using a Single RGB Frame for Real Time 3D Hand  
287 Pose Estimation in the Wild. In: *Proceedings - 2018 IEEE Winter Conference on*  
288 *Applications of Computer Vision, WACV 2018*. Vol 2018-January. Institute of Electrical  
289 and Electronics Engineers Inc.; 2018:436-445. doi:10.1109/WACV.2018.00054
- 290 33. Joo H, Simon T, Sheikh Y. Total Capture: A 3D Deformation Model for Tracking Faces,  
291 Hands, and Bodies. *CVPR*. Published online 2018.
- 292 34. Sato K, Nagashima Y, Mano T, Iwata A, Toda T. Quantifying normal and parkinsonian gait  
293 features from home movies: Practical application of a deep learning-based 2D pose  
294 estimator. *PLoS One*. 2019;14(11). doi:10.1371/journal.pone.0223549
- 295 35. Logitech. Logitech MeetUp Video Conference Camera. Published 2020. Accessed August  
296 16, 2020. <https://www.logitech.com/en-ca/product/meetup-conferencecam?crd=1689>
- 297 36. Sih BL, Hubbard M, Williams KR. Correcting out-of-plane errors in two-dimensional  
298 imaging using nonimage-related information. *J Biomech*. 2001;34(2):257-260.  
299 doi:10.1016/s0021-9290(00)00185-8
- 300 37. Hidalgo G, Fujisaka Y. OpenPose Demo - Output. Github. Published 2019. Accessed  
301 September 23, 2020. [https://github.com/CMU-Perceptual-Computing-](https://github.com/CMU-Perceptual-Computing-Lab/openpose/blob/master/doc/output.md)  
302 [Lab/openpose/blob/master/doc/output.md](https://github.com/CMU-Perceptual-Computing-Lab/openpose/blob/master/doc/output.md)
- 303 38. MathWorks. 1-D data interpolation (table lookup) - MATLAB interp1. Published 2020.  
304 Accessed August 10, 2020. <https://www.mathworks.com/help/matlab/ref/interp1.html>
- 305 39. D'Errico J. inpaint\_nans. MathWorks File Exchange. Published 2012.  
306 [https://www.mathworks.com/matlabcentral/fileexchange/4551-inpaint\\_nans](https://www.mathworks.com/matlabcentral/fileexchange/4551-inpaint_nans)
- 307 40. MathWorks. Zero-phase digital filtering - MATLAB filtfilt. Published 2020. Accessed  
308 August 10, 2020. <https://www.mathworks.com/help/signal/ref/filtfilt.html>
- 309 41. MathWorks. Align two signals by delaying earliest signal - MATLAB alignsignals.  
310 Published 2020. Accessed August 10, 2020.  
311 <https://www.mathworks.com/help/signal/ref/alignsignals.html>
- 312 42. MathWorks. Find local maxima - MATLAB findpeaks. Published 2020. Accessed August

- 313 10, 2020. <https://www.mathworks.com/help/signal/ref/findpeaks.html>
- 314 43. Microsoft Corporation. Microsoft Excel. Published online 2018.  
315 <http://office.microsoft.com/excel>
- 316 44. Ng KD, Mehdizadeh S, Iaboni A, Mansfield A, Flint A, Taati B. Measuring Gait Variables  
317 Using Computer Vision to Assess Mobility and Fall Risk in Older Adults with Dementia.  
318 *IEEE J Transl Eng Heal Med.* 2020;8. doi:10.1109/JTEHM.2020.2998326
- 319 45. Stenum J, Rossi C, Roemmich RT. Two-dimensional video-based analysis of human gait  
320 using pose estimation. *bioRxiv.* Published online July 26, 2020:2020.07.24.218776.  
321 doi:10.1101/2020.07.24.218776
